# Supplementary material for: High-dose influenza vaccination and mortality among predominantly male, white, senior veterans, United States, 2012/13 to 2014/15
Source: PubMed Central journal article supplement (PMC7238741; doi:10.2807/1560-7917.es.2020.25.19.1900401), 2020-05-14
Supplement: 19-00401_Supplement.pdf [file 19-00401_Supplement.pdf]

### Supplementary Table S1. Matching Frequency and Proportion of Subjects with High Mortality Risk

"This supplementary material is hosted by Eurosurveillance as supporting information alongside the article [High-dose influenza vaccination and mortality among predominantly male, white, senior veterans, United States, 2012/13 to 2014/15], on behalf of the authors, who remain responsible for the accuracy and appropriateness of the content. The same standards for ethics, copyright, attributions and permissions as for the article apply. Supplements are not edited by Eurosurveillance and the journal is not responsible for the maintenance of any links or email addresses provided therein."

| Season                                                        | 2012-13 | 2013-14 | 2014-15 |
|---------------------------------------------------------------|---------|---------|---------|
| Matching Frequency                                            |         |         |         |
| HD recipients with 1 matched SD recipient                     | 21%     | 20%     | 32%     |
| HD recipients with 2 matched SD recipient                     | 79%     | 80%     | 68%     |
| Proportion of Subjects with High One-year Predicted Mortality |         |         |         |
| SD recipients                                                 | 20%     | 25%     | 24%     |
| HD recipients                                                 | 14%     | 17%     | 18%     |
